# Supplementary material
Source: publisher figshare collection journal article supplement (https://karger.figshare.com/ndownloader/files/37480483)
Supplement: Supplementary file 1 [file 37480483]

**Supplementary Material Figure Legends**

**Supplementary Figure 1:** Patient recruitment flowchart.

**Supplementary Figure 2:** Correlations between all tested acoustic parameters.

**Supplementary Figure 3:** Positive (dark blue bars) and negative (light blue bars) correlations of all tested acoustic features with the Neonatal Facial Coding System (NFCS) values.
